# Supplementary material for: Evaluation of a 27-gene inherited cancer panel across 630 consecutive patients referred for testing in a clinical diagnostic laboratory
Source: Hered Cancer Clin Pract. 2018 Jan 4;16:1. doi: 10.1186/s13053-017-0083-8 (PMC5753512; doi:10.1186/s13053-017-0083-8)
Supplement: Additional file 1: — Patient characteristics and variant listing among positive cases, Pathogenic and likely pathogenic variants detected in the study. (XLSX 20 kb) [file 13053_2017_83_MOESM1_ESM.xlsx]

## Sheet: Sheet1
Gene	Transcript	c.name	p.name	Classification at the time of study1	Gender	Current Age	Age at Dx	Personal Hx Cancer2	Family Hx Cancer2
APC	NM_000038.3	c.(?_-37541)_(-27791_?)del (promoter deletion)		Pathogenic	Female	44			CrC, Lung, Skin, CvC, Renal
ATM	NM_000051.3	c.4394T>C	p.Leu1465Pro	Likely Pathogenic	Female	36			Family History of Cancer, not specified
ATM	NM_000051.3	c.6095G>A	p.Arg2032Lys	Pathogenic	Female	56	40	BrC, Non-Hodgkins Lymphoma	Pancreatic, Non-Hodgkins Lymphoma, Chronic Lymphocytic Leukemia
					Female5	30			BrC, CrC, OvC, UtC/Endo, CvC
ATM	NM_000051.3	c.3049C>T	p.Gln1017*	Pathogenic	Female	47			BrC, Pancreatic, Lung
ATM	NM_000051.3	c.8264_8268delATAAG	p.Tyr2755fs*12	Pathogenic	Female	47	46	BrC	CrC
ATM	NM_000051.3	c.2T>C	p.Met1Thr	Pathogenic	Female	60	56	BrC	BrC, OvC, Lung, Liver
ATM	NM_000051.3	c.7517_7520delGAGA	p.Arg2506fs*3	Pathogenic	Female	66	48, 65	BrC	BrC, PrC, Pancreatic
ATM	NM_000051.3	c.7271T>G	p.Val2424Gly	Pathogenic	Female	62	57	BrC	BrC, CrC
BARD1	NM_000465.2	c.1690C>T	p.Gln564*	Pathogenic	Female6	47
BRCA1	NM_007294.2	c.68_69delAG	p.Glu23fs*17	Pathogenic	Female	35	34	BrC	BrC
					Female	35			BrC, Pancreatic
BRCA1	NM_007294.2	c.181T>G	p.Cys61Gly	Pathogenic	Female	46			BrC, CrC, Pancreatic, Testicular, Gastric
					Male	56			CrC, OvC, PrC, Abdominal
BRCA1	NM_007294.2	c.5266dupC	p.Gln1756fs*74	Pathogenic	Female	46	44	BrC	BrC, Lung
BRCA1	NM_007294.2	c.2241delC	p.Asp749fs*4	Pathogenic	Female	23			BrC
BRCA1	NM_007294.2	c.2806_2809delGATA	p.Asp936fs*63	Pathogenic	Female	38			BrC, CrC, OvC, Pancreatic, Gastric, Brain
BRCA1	NM_007294.2	c.5503C>T	p.Arg1835*	Pathogenic	Female	39	38	BrC	BrC, CrC, Gastric
BRCA1	NM_007294.2	c.4358-?_5277+?del (Exon 13-19 deletion)		Pathogenic	Female	61	60	OvC, UtC/Endo	BrC
BRCA1	NM_007294.2	c.1874_1877dupTAGT	p.Val627fs*4	Pathogenic	Female	55	55	BrC	BrC, Lung
BRCA2	NM_000059.3	c.5799_5802delCCAA	p.Asn1933fs*29	Pathogenic	Female	32	31	BrC	Lung, B cell lymphoma
BRCA2	NM_000059.3	c.5576_5579delTTAA	p.Ile1859fs*3	Pathogenic	Female	49	42, 47	BrC	PrC, Bladder
BRCA2	NM_000059.3	c.1670T>G	p.Leu557*	Pathogenic	Female	34			Family History of Cancer (HBOC)
BRCA2	NM_000059.3	c.3076_3077delAA	p.Lys1026fs*9	Likely Pathogenic	Female	29			BrC, PrC, Bladder, Lung
BRCA2	NM_000059.3	c.3847_3848delGT	p.Val1283fs*2	Pathogenic	Female	46	45	BrC	BrC, CrC, Skin
BRCA2	NM_000059.3	c.7618-1G>A		Pathogenic	Male	59			BrC, CrC, OvC, PrC
BRCA2	NM_000059.3	c.6275_6276delTT	p.Leu2092fs*7	Pathogenic	Female6	59
BRCA2	NM_000059.3	c.4263dupT	p.Glu1422*	Likely Pathogenic	Female	61			OvC, Leukemia
BRCA2	NM_000059.3	c.6944_6947delTAAA	p.Ile2315fs*12	Pathogenic	Female	36			BrC
BRCA2	NM_000059.3	c.658_659delGT	p.Val220fs*4	Pathogenic	Female	61			BrC, CrC, Lung, UtC/Endo
BRIP1	NM_032043.1	c.2765T>G	p.Leu922*	Likely Pathogenic	Female6	73
BRIP1	NM_032043.1	c.1343G>A	p.Trp448*	Likely Pathogenic	Female	49			BrC
BRIP1	NM_032043.1	c.440dupA	p.Tyr147*	Likely Pathogenic	Female	51			BrC, OvC, PrC, Lung, Thyroid
BRIP1	NM_032043.1	c.2392C>T	p.Arg798*	Pathogenic	Female	49			BrC, OvC, Multiple Myeloma
BRIP1	NM_032043.1	c.2255_2256delAA	p.Lys752fs*12	Pathogenic	Female	30			BrC
CDH1	NM_004360.2	c.2287G>T	p.Glu763*	Likely Pathogenic	Female5	64			BrC, Gastric
CHEK2	NM_007194.3	c.1100delC	p.Thr367fs*15	Pathogenic	Female	42	41	BrC	BrC, CrC, PrC, Renal
					Male	65			BrC
					Female	68	57	BrC, UtC/Endo	BrC
					Female6	56
					Male	85	60	CrC, PrC, Renal	BrC, Testicular
					Female	47			BrC, CrC
CHEK2	NM_007194.3	c.349A>G	p.Arg117Gly	Likely Pathogenic	Female	49			BrC
CHEK2	NM_007194.3	c.1555C>T	p.Arg519*	Pathogenic	Male5	43		CrC
CHEK2	NM_007194.3	c.1259+1G>A4		Likely Pathogenic	Female	61			BrC, Pancreatic, Lung, UtC/Endo, Testicular
MSH2	NM_000251.1	c.942+3A>T		Pathogenic	Female	43	42	CrC	BrC, CrC, Gastric
					Female	29			CrC
					Female	56	40	BrC	CrC, PrC, Pancreatic, UtC/Endo, Bladder
MSH2	NM_000251.1	c.528_529delTG	p.Cys176*	Pathogenic	Female	44	43	UtC/Endo	BrC, CrC
MSH6	NM_000179.2	c.1128_1132delAAAGA4	p.Arg379*	Likely Pathogenic	Female	63	62	UtC/Endo	UtC/Endo
MSH6	NM_000179.2	c.3013C>T	p.Arg1005*	Pathogenic	Male	29			CrC
MSH6	NM_000179.2	c.651dupT	p.Lys218*	Pathogenic	Female6	50
MUTYH	NM_001128425.1	c.325C>T	p.Arg109Trp	Likely Pathogenic	Female	41			BrC, CrC, Thyroid, Lymphoma
MUTYH	NM_001128425.1	c.1477G>T	p.Val493Phe	Likely Pathogenic	Female	52			BrC, Pancreatic, Skin
MUTYH	NM_001128425.1	c.1187G>A	p.Gly396Asp	Pathogenic	Female	61		Skin	BrC, CrC, Lung, Skin
					Female	64	63	BrC	OvC, Pancreatic
					Male	27			CrC, Pancreatic, Skin, Leukemia
					Female	45			BrC, CrC
					Female	40			CrC, OvC, Lung, Throat
					Female	62	61	BrC	OvC, Pancreatic, Lung
					Female	52	15	BrC, Hodgkins Lymphoma	BrC, Lymphoma
					Male	77	75	PrC
					Female5	30			BrC, CrC, OvC, UtC/Endo, CvC
MUTYH	NM_001128425.1	c.536A>G	p.Tyr179Cys	Pathogenic	Female3	57	49	CrC	BrC, CrC, UtC/Endo
MUTYH	NM_001128425.1	c.933+3A>C		Pathogenic	Female	68	67	BrC	BrC, Bone
MUTYH	NM_001128425.1	c.1435G>T	p.Glu479*	Likely Pathogenic	Female5	53			OvC
NBN	NM_002485.4	c.2071-1G>A		Likely Pathogenic	Female	63			CrC, UtC/Endo, Liver
NBN	NM_002485.4	c.657_661delACAAA	p.Lys219fs*16	Pathogenic	Female	58			BrC
NBN	NM_002485.4	c.156_157delTT	p.Ser53fs*9	Likely Pathogenic	Female	28			BrC, CrC, PrC, UtC/Endo, Bladder, Bone
PALB2	NM_024675.3	c.2218C>T4	p.Gln740*	Likely Pathogenic	Female	40			BrC, OvC, UtC/Endo
PALB2	NM_024675.3	c.2167_2168delAT	p.Met723fs*21	Pathogenic	Female	30			BrC, CrC, OvC, Pancreatic, Thyroid, Renal
PALB2	NM_024675.3	c.228_229delAT4	p.Ile76fs*4	Likely Pathogenic	Male5	43		CrC
PALB2	NM_024675.3	c.196C>T	p.Gln66*	Pathogenic	Female	57			BrC
PMS2	NM_000535.4	c.2186_2187delTC	p.Leu729fs*6	Likely Pathogenic	Female	60	42	BrC	Lung, Brain, CvC
					Female6	53
					Female5	53			OvC
					Female	44			BrC, CrC, OvC
PMS2	NM_000535.4	c.2174+1G>A		Pathogenic	Female5	64			BrC, Gastric
PMS2	NM_000535.4	c.-87-?_2589+?del (Exon 1-15 deletion)		Pathogenic	Female	49	46	CvC	BrC, Gastric
PMS2	NM_000535.4	c.1021delA	p.Arg341fs*15	Pathogenic	Female6	69
1These classifications are subject to periodic re-evaluation.
2CrC, colorectal cancer; CvC, cervical cancer; BrC, breast cancer; OvC, ovarian cancer; UtC, uterine cancer; Endo, endometrial cancer; PrC, prostate cancer
3Pt homozygous for this mutation
4Novel variant
5Pts carried multiple DV
6No clinical data was provided for these patients
